# Supplementary material for: HBsAg Dampened STING Associated Activation of NK Cells in HBeAg-Negative CHB Patients
Source: MDPI journal article supplement (doi:10.3390/ijms22147643), 2021-07-16
Supplement: s1 [file s1]

## **SUPPLEMENTARY INFORMATION**

Table S1 Primers for PCR.

Table S2 Antibodies for Flow Cytometry.

Table S3. Primers for ChIP.

Figure S1. STING levels of NK cells was negatively correlated with serum HBsAg levels in CHB patients.

Figure S2. STAT3 levels was positively correlated with STING levels in NK cells of CHB patients.

Figure S3. The sequence and positions of the 5 predicted binding sites upstream of STING.

**Table S1 Primers for PCR.**

| Name             | Sequence               |
|------------------|------------------------|
| STING-F          | GAGAGCCACCAGAGCACA     |
| STING-R          | TAGATGGACAGCAGCAACAG   |
| IFN- $\alpha$ -F | TGGGCTGTGATCTGCCTCAAAC |
| IFN- $\alpha$ -R | CAGCCTTTTGGAAGTGGTTGCC |

**Table S2 Antibodies for Flow Cytometry.**

| Name                                         | Cat No. | Company        |
|----------------------------------------------|---------|----------------|
| FITC anti-humanCD3                           | 300306  | Biolegend, USA |
| PerCP/Cy5.5 anti-human CD56                  | 318322  | Biolegend, USA |
| PE anti-human CD107a                         | 328608  | Biolegend, USA |
| Alexa Fluor® 647 anti-human/mouse Granzyme B | 515406  | Biolegend, USA |
| APC anti-human Perforin                      | 353312  | Biolegend, USA |
| PE anti-human IFN- $\gamma$                  | 502509  | Biolegend, USA |
| Alexa Fluor® 647 anti-human CD335 (NKp46)    | 331910  | Biolegend, USA |

**Table S3 Primers for ChIP.**

| Name           | Sequence               |
|----------------|------------------------|
| ChIP-STING-1-F | TAGATTCTTCTTGGCCTCTCTG |
| ChIP-STING-1-R | AAGGGAAGGTCTGACCTACATT |
| ChIP-STING-2-F | CGATCTCGGCTCAGTGCAACCT |
| ChIP-STING-2-R | AATTAGCTGGGCGTGATGGCGC |
| ChIP-STING-3-F | AGGCTGGTCTCAAACCTCTGGG |
| ChIP-STING-3-R | AAGCCTGGTGGGTTGCTCCAAA |
| ChIP-STING-4-F | GGCTGGTGAAATGATATACAAG |
| ChIP-STING-4-R | ACCTACATTGTTTGAGTGTAGG |
| ChIP-STING-5-F | CCACTGTGCCAGGCCTGCAATT |
| ChIP-STING-5-R | CAGGAAATGGCCACGCCTGTGA |

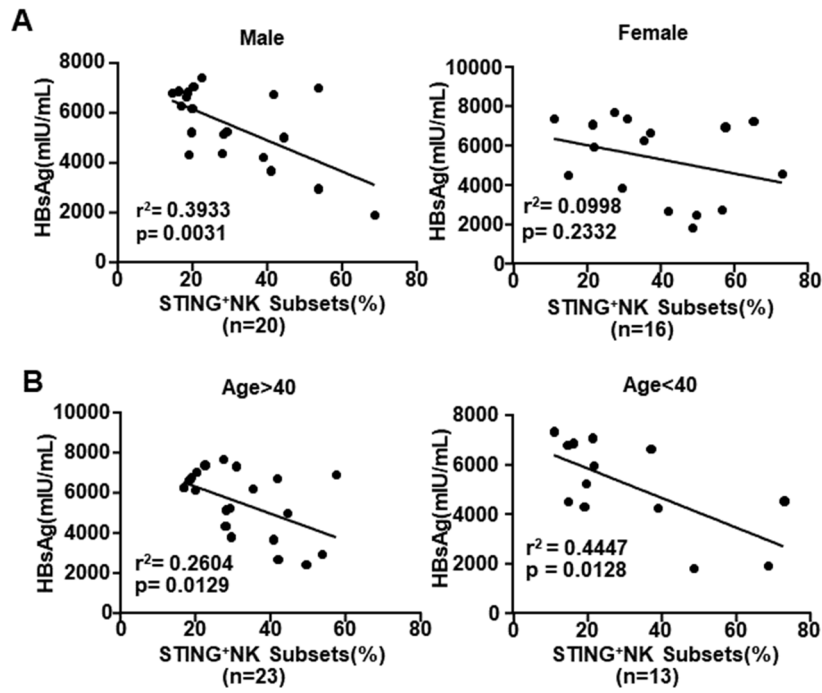

**Figure S1. STING levels of NK cells was negatively correlated with serum HBsAg levels in CHB patients.**

The correlation between serum HBsAg levels and STING expression levels in NK cells (CD3<sup>+</sup>CD56<sup>+</sup>) of CHB patients grouping by gender (A) and age (B). The correlation between variables was analyzed by Pearson coefficient. CHB, CHB patients; NK, natural killer.

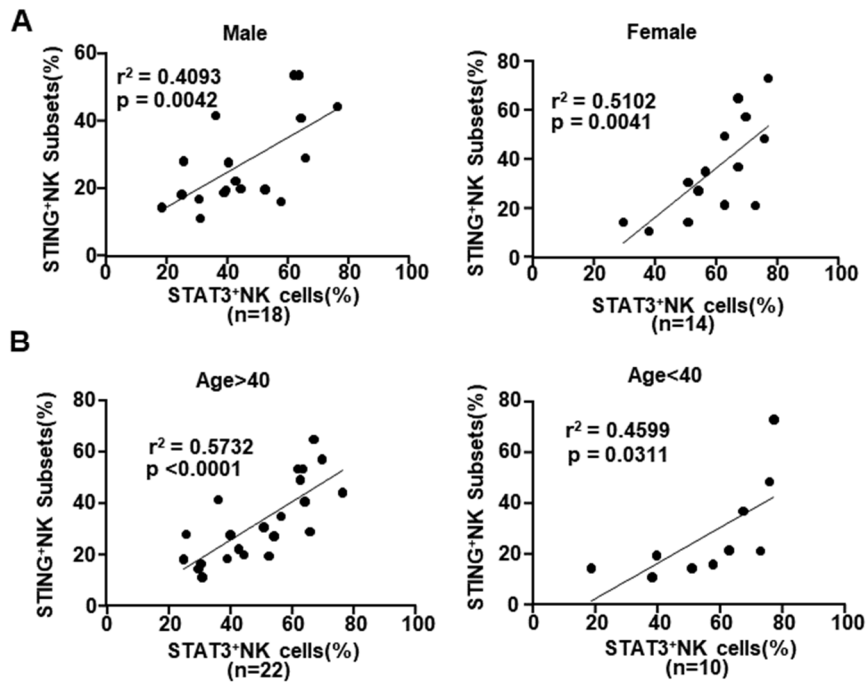

**Figure S2. STAT3 levels was positively correlated with STING levels in NK cells of CHB patients.**

(A-B) The correlation between STING and STAT3 expression levels in NK cells ( $CD3^-CD56^+$ ) of CHB patients grouping by gender (A) and age (B). The correlation between variables was analyzed by Pearson coefficient. CHB, CHB patients; NK, natural killer.

**.....Binding Site 1**

-1660 TAGATTCTTC TTGGCCTCTC TGAGCGTGTG TTCCTTCTTT  
-1620 CTGAGTGTGG GGCAGGGCCC TCTCTGGAAG GGGGATTTTA  
-1580 TAATCTACAC TCAAACAATG TAGGTCAGAC CTTCCCTT

**.....Binding Site 2**

-1424 AGGCTGGTCT CAAACTTCTG GGCTCAAGTG ATCCTCCTGC  
-1384 CTTGGCCTCC CAAAGTGCTG GG**ATTACTGG** AATGAAATCA  
-1344 AGGCACAGAG CAAGCTGGGC TTTGGAGCAA CCCACCAGGC  
-1304 TT

**.....Binding Site 3**

-667 AGGCTGGTCT CAAACTTCTG GGCTCAAGTG ATCCTCCTGC  
-627 CTTGGCCTCC CAAAGTGCTG GG**ATTACTGG** AATGAAATCA  
-587 AGGCACAGAG CAAGCTGGGC TTTGGAGCAA CCCACCAGGC  
-567 TT

**.....Binding Site 4**

-443 GGCTGGTGAA ATGATATACA AGTGAAGTGA TATATGCAAC  
-403 ACTTGGCATA **ATGTCTGGAA** CAAGGTAAAC ACTTTATTAT  
-363 TATTATTATT ATTATAATTT AGGTTGATGC ATGGGGATTT  
-323 TATAACCTAC ACTCAAACAA TGTAGGT

**.....Transcription Start**

AAAGCGCTGGGATTACAGGC**ATG**AG

**.....Binding Site 5**

+3 CCACTGTGCC AGGCCTGCAA TTA(TTTT)GC TCCTACCTAA  
+43 TATCATCCCC ACAACCGC**CT TCTGGGCAGA**\_AACCGGCAGG  
+83 CTCTCTTGGA GAAGTCACAG GCGTGGCCAT TTCCTGCAAA

**Figure S3. The sequence and positions of the 5 predicted binding sites upstream of STING.**
